# Supplementary material for: Glucocorticoid-driven transcriptomes in human airway epithelial cells: commonalities, differences and functional insight from cell lines and primary cells
Source: BMC Med Genomics. 2019 Jan 31;12:29. doi: 10.1186/s12920-018-0467-2 (PMC6357449; doi:10.1186/s12920-018-0467-2)
Supplement: Supplementary file 7 — GO terms associated with budesonide-induced genes (≥2 fold, P ≤ 0.05) in A549, BEAS-2B, and HBE cells. Budesonide-induced genes ≥2 fold (P ≤ 0.05) in A549 (187 genes), BEAS-2B (240 genes), and HBE (86 genes) were subjected to GO analysis using DAVID. Biological processes (BP) and molecular function (MF) terms that were significantly enriched (EASE score ≤ 0.1) with each list and represented by at least 5 genes are listed. GO terms that are significantly enriched following family-wide false discovery rate correction (Benjamini ≤0.05) are colored red. (XLSX 26 kb) [file 12920_2018_467_MOESM7_ESM.xlsx]

## Sheet: GO of induced genes 2 fold
Cell variant	GO term	GO description	Category	Count	%	P value	Fold enrichment	Benjamini	Genes	A549	B2B	HBE
A549	GO:0005515	protein binding	MF	108	55.9585	0.00568082	1.1927	0.64137	ADRA2A, AHNAK, AKAP12, AKAP13, ALOX5AP, AMOTL2, ANGPTL4, ANKRD1, ARRB1, BCL6, BIRC3, C11orf54, C1orf116, CALD1, CAVIN2, CDKN1C, CEBPB, CEBPD, CEP70, CHN2, CIART, CITED2, CKB, CRYAB, CTGF, DNAJC15, DOCK4, DUSP1, EIF2AK3, EMP1, EMP2, ENOX1, ERRFI1, FAIM, FKBP5, FOS, FOXO1, FOXO3, G0S2, GADD45A, GADD45B, GPR1, HIPK2, HOMER2, HOXC13, HPCAL1, ID1, IFIT1, IFNGR1, IL6R, IRS2, ITGB4, KITLG, KLF6, KRT6A, …	X	X
A549	GO:0000122	negative regulation of transcription from RNA polymerase II promoter	BP	16	8.29016	0.0076065	2.14457	0.71954	ANKRD1, BCL6, CDKN1C, CITED2, FOXO1, FOXO3, HIPK2, ID1, PER1, PER2, SNAI2, TBX3, TFCP2L1, TRIM29, TSC22D3, ZFP36	X	X
A549	GO:0006915	apoptotic process	BP	15	7.77202	0.00224668	2.55306	0.631624	ARRB1, BIRC3, CIDEC, FAIM, FOXO1, GADD45A, GADD45B, GRAMD4, NFKBIA, NOTCH2, PRKCD, RHOB, SGK1, TNFAIP3, TNS4	X	X
A549	GO:0043066	negative regulation of apoptotic process	BP	13	6.73575	0.00270475	2.75731	0.594203	ANGPTL4, BIRC3, CITED2, CRYAB, DUSP1, FAIM, FOXO1, ID1, MCL1, NFKBIA, NOTCH2, TBX3, THBS1	X	X
A549	GO:0008284	positive regulation of cell proliferation	BP	13	6.73575	0.00328078	2.69222	0.58332	ADRA2A, CTGF, EDN2, EDN3, EMP2, HIPK2, IL6R, IRS2, KRT6A, LIFR, TBC1D8, TBX3, THBS1	X
A549	GO:0043547	positive regulation of GTPase activity	BP	12	6.21762	0.0323285	2.04968	0.912125	AGFG2, AKAP13, ARRB1, CDC42EP3, CHN2, DOCK4, ERRFI1, FGD4, IRS2, KITLG, RGS2, STARD13	X	X
A549	GO:0043065	positive regulation of apoptotic process	BP	11	5.69948	0.00112024	3.53854	0.525976	AKAP13, ANKRD1, BCL6, CNR1, DUSP1, FGD4, FOXO1, FOXO3, GADD45A, GADD45B, RHOB	X	X
A549	GO:0035556	intracellular signal transduction	BP	11	5.69948	0.0090586	2.63415	0.739924	AKAP13, CHN2, CORO2A, CTGF, DUSP1, PAG1, PRKCD, SGK1, STAC2, TNS2, ZFP36	X	X
A549	GO:0045892	negative regulation of transcription, DNA-templated	BP	11	5.69948	0.0341242	2.12738	0.900972	BCL6, CDKN1C, CEBPB, CEBPD, CIART, CITED2, FOXO1, ID1, PER1, PER2, TBX3	X	X	X
A549	GO:0046982	protein heterodimerization activity	MF	10	5.18135	0.0504065	2.08639	0.990485	ABCG1, ADRA2A, BTBD11, CEBPB, CEBPD, FOS, HOMER2, IRAK3, MCL1, SLC51B	X
A549	GO:0005096	GTPase activator activity	MF	9	4.66321	0.00816686	3.12959	0.626204	AGFG2, ARRB1, CDC42EP3, CHN2, DOCK4, ERRFI1, RGS2, STARD13, TBC1D8	X	X
A549	GO:0019901	protein kinase binding	MF	8	4.14508	0.0925517	2.0642	0.997053	ADRA2A, EMP2, ERRFI1, FOXO3, IRS2, PRKCD, RGCC, ZFP36	X
A549	GO:0007568	aging	BP	7	3.62694	0.00730115	4.09418	0.803443	CDKN1C, CNR1, CRYAB, CTGF, FOS, FOXO3, IGFBP1	X	X
A549	GO:0042981	regulation of apoptotic process	BP	7	3.62694	0.023157	3.17155	0.892379	BCL6, BIRC3, CIDEC, DUSP1, MCL1, NDRG1, SGK1	X	X
A549	GO:0001525	angiogenesis	BP	7	3.62694	0.0281427	3.02933	0.920731	ANGPTL4, ANPEP, CTGF, EIF2AK3, ID1, RHOB, SERPINE1	X
A549	GO:0098641	cadherin binding involved in cell-cell adhesion	MF	7	3.62694	0.0782545	2.3418	0.997169	AHNAK, CALD1, NDRG1, PACSIN2, PKP2, S100P, TRIM29	X
A549	GO:0042493	response to drug	BP	7	3.62694	0.0946645	2.22217	0.997573	ACSL1, CA9, CPB2, FOS, KCNJ11, NNMT, THBS1	X	X
A549	GO:0019900	kinase binding	MF	6	3.10881	0.00103203	7.76138	0.310456	CEBPB, EMP2, PER1, PRKCD, TNFAIP3, TNS2	X
A549	GO:0030036	actin cytoskeleton organization	BP	6	3.10881	0.0111602	4.45411	0.775728	ABLIM2, ADRA2A, BCL6, CORO2A, FGD4, PACSIN2	X	X
A549	GO:0051056	regulation of small GTPase mediated signal transduction	BP	6	3.10881	0.0125997	4.32115	0.78463	AKAP13, CHN2, FGD4, RHOB, RHOBTB2, STARD13	X	X
A549	GO:0001666	response to hypoxia	BP	6	3.10881	0.0331857	3.36648	0.906142	ANGPTL4, CA9, CITED2, CRYAB, DDIT4, THBS1	X
A549	GO:0043407	negative regulation of MAP kinase activity	BP	5	2.59067	0.000495518	13.4036	0.483249	DUSP1, IRAK3, PRKCD, RGS2, SPRY1	X
A549	GO:0007623	circadian rhythm	BP	5	2.59067	0.00749617	6.43372	0.761118	ID1, KLF9, PER1, PER2, SERPINE1	X
A549	GO:0030182	neuron differentiation	BP	5	2.59067	0.0167716	5.07925	0.847018	CEBPB, DDIT4, EDN3, HIPK2, ID1	X	X
A549	GO:0030336	negative regulation of cell migration	BP	5	2.59067	0.0167716	5.07925	0.847018	ABHD2, CITED2, PKP2, RHOB, SERPINE1	X
A549	GO:0071456	cellular response to hypoxia	BP	5	2.59067	0.017364	5.02634	0.833834	ANKRD1, FOXO3, HIPK2, NDRG1, RGCC	X	X
A549	GO:0071222	cellular response to lipopolysaccharide	BP	5	2.59067	0.0294642	4.27017	0.91707	ANKRD1, CEBPB, SERPINE1, TNFAIP3, ZFP36	X	X
A549	GO:0045766	positive regulation of angiogenesis	BP	5	2.59067	0.0311466	4.1959	0.916193	ANGPTL4, HIPK2, RHOB, SERPINE1, THBS1	X
A549	GO:0032496	response to lipopolysaccharide	BP	5	2.59067	0.0896677	2.94225	0.997417	CNR1, FOS, IRAK3, PTGER4, THBD	X	X
BEAS-2B	GO:0005515	protein binding	MF	129	51.1905	0.044971	1.11659	0.862264	ABCA1, ABLIM3, ALCAM, ALOX5AP, ALPP, ANKRD1, APBB2, APOB, AREG, ARHGAP26, ARID5B, ARMC8, BBS10, BCL6, BIRC3, CACNB2, CD200, CD59, CDKN1C, CEBPB, CEBPD, CFLAR, CHN2, COL8A1, DKK1, DMBT1, DMD, DNAJB4, DUSP1, DUSP23, ELF1, EPS8, ERRFI1, EYA4, FAM218A, FAM46B, FBXO32, FKBP5, FLRT3, FNBP1L, FOXC2, FOXN3, FOXO1, FOXO3, GADD45B, GAS1, GATA3, GCNT1, GHR, GLUL, GPR1, HLX, HMGB1, IKZF2, IL1R1, IMPA2, IP6K2…	X	X
BEAS-2B	GO:0046872	metal ion binding	MF	39	15.4762	0.0190833	1.43334	0.712111	AOX1, BCL6, BNC2, CACNA2D3, CHN2, DMRTA1, ENDOD1, EYA4, FGD4, GALNT15, GMPR, HIVEP3, IKZF2, ITGA10, JAK2, KALRN, KLF15, KLF4, KLF9, MOB3B, MT1E, MT1G, MT1M, MT1X, MT2A, MT3, NPAS2, NUDT4, PDE6A, PLA2G4A, PRDM1, PTGS2, RHOU, TGFBR2, TGM2, TIPARP, ZBTB16, ZFP36, ZNF469		X
BEAS-2B	GO:0045944	positive regulation of transcription from RNA polymerase II promoter	BP	29	11.5079	0.000101489	2.22601	0.0467516	ABLIM3, ANKRD1, CEBPB, CEBPD, CITED4, ELF1, FOXC2, FOXO1, FOXO3, GATA3, HMGB1, IKZF2, JAG1, KLF15, KLF4, LPIN1, NCOA3, NFIA, NFKBIA, NPAS2, PER1, PIK3R1, PLSCR1, PPARG, RGCC, SERPINE1, SOX4, THRA, WNT5A		X	X
BEAS-2B	GO:0008270	zinc ion binding	MF	27	10.7143	0.00562149	1.75628	0.517429	ABLIM2, ABLIM3, ALPP, BIRC3, BNC2, CPM, DMD, GATA3, KLF4, LMO3, MMP7, MT1E, MT1G, MT1M, MT1X, MT2A, MT3, NANOS1, NEBL, PPARG, RNF150, SH3RF3, SP110, THRA, ZFAND5, ZMYND8, ZNF385B		X
BEAS-2B	GO:0003700	transcription factor activity, sequence-specific DNA binding	MF	25	9.92063	0.00181758	1.97816	0.609585	BCL6, CEBPB, CEBPD, DMRTA1, ELF1, FOXC2, FOXL1, FOXN3, FOXO3, GATA3, HIVEP3, HMGB1, IKZF2, KLF4, KLF9, NFIA, NPAS2, PPARG, PRDM1, SOX4, TFCP2L1, THRA, TSC22D3, WNT5A, ZBTB16		X
BEAS-2B	GO:0043065	positive regulation of apoptotic process	BP	21	8.33333	3.26183e-09	5.27103	6.15506e-06	ALDH1A3, ANKRD1, APBB2, BCL6, CNR1, DUSP1, FGD4, FOXO1, FOXO3, FRZB, GADD45B, HMGB1, IP6K2, ITSN1, KALRN, LPAR1, PTGS2, RPS6KA2, SOX4, TGM2, ZBTB16	X	X
BEAS-2B	GO:0000122	negative regulation of transcription from RNA polymerase II promoter	BP	20	7.93651	0.00333138	2.09168	0.342813	ANKRD1, ANKRD2, ARID5B, BCL6, CDKN1C, DKK1, FOXC2, FOXO1, FOXO3, GATA3, HMGB1, KLF4, NFIA, PER1, PPARG, PRDM1, TFCP2L1, TSC22D3, ZBTB16, ZFP36	X	X
BEAS-2B	GO:0045893	positive regulation of transcription, DNA-templated	BP	18	7.14286	0.000510511	2.63186	0.1286	CDKN1C, ELF1, FOXC2, FOXN3, FOXO1, FOXO3, GATA3, HIVEP3, KLF4, MT3, NCOA3, NPAS2, PPARG, SEC14L2, SOX4, WNT4, WNT5A, ZBTB16		X
BEAS-2B	GO:0045892	negative regulation of transcription, DNA-templated	BP	16	6.34921	0.00268846	2.41444	0.323462	ARID5B, BCL6, CDKN1C, CEBPB, CEBPD, FOXN3, FOXO1, GATA3, KLF4, MT3, PER1, PPARG, THRA, WNT4, WNT5A, ZBTB16	X	X	X
BEAS-2B	GO:0042803	protein homodimerization activity	MF	15	5.95238	0.0991844	1.56248	0.972682	ALDH1A3, CD200, CEBPB, CEBPD, DMRTA1, FLRT3, GHR, HOGA1, IKZF2, IMPA2, NECTIN4, NLGN4X, NPR3, PTGS2, ZBTB16		X
BEAS-2B	GO:0043066	negative regulation of apoptotic process	BP	13	5.15873	0.0181796	2.15144	0.628111	ACTC1, APBB2, BIRC3, CD59, CFLAR, DUSP1, FCMR, FOXO1, MT3, NFKBIA, PIK3R1, TGM2, WNT5A	X	X
BEAS-2B	GO:0006366	transcription from RNA polymerase II promoter	BP	13	5.15873	0.0402424	1.9082	0.814546	CEBPB, CEBPD, ELF1, FOXC2, FOXO3, GATA3, HIVEP3, KLF15, KLF4, NFIA, PLSCR1, SOX4, THRA		X
BEAS-2B	GO:0043565	sequence-specific DNA binding	MF	13	5.15873	0.0404497	1.90835	0.85639	BCL6, CEBPB, ELF1, FOXC2, FOXL1, FOXN3, FOXO1, FOXO3, HIVEP3, HLX, PPARG, TFCP2L1, THRA		X
BEAS-2B	GO:0043547	positive regulation of GTPase activity	BP	13	5.15873	0.0728595	1.73258	0.939133	ARHGAP26, CDC42EP3, CHN2, ERRFI1, FGD4, FNBP1L, IRS2, ITSN1, JAK2, KALRN, KITLG, RGS2, WNT4	X	X
BEAS-2B	GO:0006915	apoptotic process	BP	13	5.15873	0.0740144	1.72647	0.938607	ACTC1, BIRC3, CFLAR, FOXO1, GADD45B, JAK2, MAP3K8, MT3, NFKBIA, PLSCR1, SGK1, TGFBR2, ZBTB16	X	X
BEAS-2B	GO:0008285	negative regulation of cell proliferation	BP	12	4.7619	0.0165686	2.28183	0.626641	BCL6, FRZB, GATA3, JAK2, KLF4, NDRG1, PTGS2, RERG, RGCC, RPS6KA2, SOX4, ZBTB16		X
BEAS-2B	GO:0035556	intracellular signal transduction	BP	12	4.7619	0.0186066	2.2422	0.626368	APBB2, CHN2, DUSP1, ITSN1, JAK2, KALRN, NUDT4, PLCB4, RPS6KA2, SGK1, TGFBR3, ZFP36	X	X
BEAS-2B	GO:0007155	cell adhesion	BP	12	4.7619	0.0421509	1.96864	0.822541	ALCAM, COL8A1, ITGA10, ITGB4, KITLG, NECTIN4, NLGN4X, PCDH10, PCDH18, PDZD2, SVEP1, VCL		X
BEAS-2B	GO:0007275	multicellular organism development	BP	12	4.7619	0.0873325	1.73437	0.961365	CHST2, DMBT1, EYA4, FOXL1, FRZB, GADD45B, HIVEP3, HLX, JAG1, MN1, WNT4, WNT5A		X
BEAS-2B	GO:0042127	regulation of cell proliferation	BP	10	3.96825	0.000808331	4.07029	0.155954	BCL6, JAG1, JAK2, NDRG1, NFKBIA, PLA2G4A, PTGER2, SGK1, TGFBR2, TRNP1		X
BEAS-2B	GO:0044212	transcription regulatory region DNA binding	MF	10	3.96825	0.00201492	3.56998	0.406301	ARID5B, FOXC2, GATA3, HIVEP3, IKZF2, KLF15, KLF4, PPARG, THRA, WNT5A		X
BEAS-2B	GO:0001077	transcriptional activator activity, RNA polymerase II core promoter proximal region sequence-specific binding	MF	10	3.96825	0.00397836	3.22206	0.496902	CEBPB, CEBPD, ELF1, FOXC2, GATA3, KLF15, KLF4, NFIA, PLSCR1, SOX4		X
BEAS-2B	GO:0008134	transcription factor binding	MF	10	3.96825	0.0127317	2.67748	0.668489	APBB2, CEBPB, GATA3, HMGB1, NFIA, NFKBIA, PER1, PIK3R1, PPARG, THRA		X
BEAS-2B	GO:0010628	positive regulation of gene expression	BP	9	3.57143	0.0233947	2.58666	0.663622	ACTC1, APOB, KLF4, MT3, NCOA3, PLSCR1, PRDM1, RGCC, RPS6KA2		X
BEAS-2B	GO:0003779	actin binding	MF	9	3.57143	0.0303114	2.46174	0.796348	ABLIM2, ABLIM3, DAAM2, DMD, EPS8, FGD4, KLHL4, TNNT2, VCL		X
BEAS-2B	GO:0042493	response to drug	BP	9	3.57143	0.0493476	2.22929	0.857566	ABCA1, ACSL1, ACTC1, GATA3, PLIN2, PPARG, PTGS2, SEMA3C, TGFBR2	X	X
BEAS-2B	GO:0090090	negative regulation of canonical Wnt signaling pathway	BP	8	3.1746	0.00601476	3.69573	0.434025	DKK1, FOXO1, FOXO3, FRZB, IGFBP1, NKD1, WNT4, WNT5A		X
BEAS-2B	GO:0007507	heart development	BP	8	3.1746	0.0110181	3.29182	0.513693	FLRT3, FOXC2, FOXL1, GATA3, PPARG, RPS6KA2, SOX4, TGFBR2		X
BEAS-2B	GO:0042981	regulation of apoptotic process	BP	8	3.1746	0.02337	2.82819	0.672271	BCL6, BIRC3, CFLAR, DUSP1, GAS1, JAK2, NDRG1, SGK1	X	X
BEAS-2B	GO:0005096	GTPase activator activity	MF	8	3.1746	0.074693	2.18037	0.943117	ARHGAP26, CDC42EP3, CHN2, ERRFI1, KALRN, RGS2, TBC1D12, TBC1D8	X	X
BEAS-2B	GO:0032869	cellular response to insulin stimulus	BP	7	2.77778	0.000541453	6.8455	0.119926	ERRFI1, FOXO1, GHR, IRS2, LPIN1, PIK3R1, PPARG		X	X
BEAS-2B	GO:0071456	cellular response to hypoxia	BP	7	2.77778	0.00172076	5.49066	0.237248	ANKRD1, FOXO3, KCNK2, MT3, NDRG1, PTGS2, RGCC	X	X
BEAS-2B	GO:0030308	negative regulation of cell growth	BP	7	2.77778	0.00543872	4.35622	0.418198	APBB2, BCL6, FRZB, IP6K2, MT3, PPARG, RERG		X
BEAS-2B	GO:0030036	actin cytoskeleton organization	BP	7	2.77778	0.00765683	4.05464	0.482774	ABLIM2, ABLIM3, ARHGAP26, BCL6, DAAM2, FGD4, RHOU	X	X
BEAS-2B	GO:0007204	positive regulation of cytosolic calcium ion concentration	BP	7	2.77778	0.00882708	3.93361	0.487895	HMGB1, JAK2, LPAR1, PTGER2, PTGER4, S1PR3, SAA1		X
BEAS-2B	GO:0032496	response to lipopolysaccharide	BP	7	2.77778	0.0219526	3.21404	0.667881	APOB, CNR1, JAK2, PTGER2, PTGER4, PTGS2, THBD	X	X
BEAS-2B	GO:0007568	aging	BP	7	2.77778	0.0225377	3.19456	0.668111	CDKN1C, CNR1, DMD, FOXO3, IGFBP1, MMP7, TGFBR2	X	X
BEAS-2B	GO:0019904	protein domain specific binding	MF	7	2.77778	0.056049	2.55906	0.899131	EPB41L5, IRS2, NEDD4, TGM2, THRA, WNT5A, ZBTB16		X
BEAS-2B	GO:0048008	platelet-derived growth factor receptor signaling pathway	BP	6	2.38095	3.53936e-05	15.5794	0.032843	ARID5B, JAK2, MYO1E, PLAT, TIPARP, ZFAND5		X
BEAS-2B	GO:0045165	cell fate commitment	BP	6	2.38095	0.000340385	9.8218	0.120572	GAS1, GATA3, PPARG, PRDM1, WNT4, WNT5A		X
BEAS-2B	GO:0045600	positive regulation of fat cell differentiation	BP	6	2.38095	0.00037685	9.61282	0.111785	CEBPB, FRZB, LMO3, PPARG, ZBTB16, ZFP36		X
BEAS-2B	GO:0050727	regulation of inflammatory response	BP	6	2.38095	0.00145557	7.17147	0.240326	BCL6, BIRC3, IL1R1, JAK2, PTGS2, SLC7A2		X
BEAS-2B	GO:0009791	post-embryonic development	BP	6	2.38095	0.0027966	6.18908	0.314406	APOB, ARID5B, GATA3, PRDM1, SEMA3C, TIPARP		X
BEAS-2B	GO:0060021	palate development	BP	6	2.38095	0.00333197	5.94477	0.32539	ARID5B, BNC2, TGFBR2, TGFBR3, TIPARP, WNT5A		X
BEAS-2B	GO:0008286	insulin receptor signaling pathway	BP	6	2.38095	0.00372751	5.79234	0.323956	FOXC2, FOXO1, IGFBP1, IRS2, PDK4, PIK3R1		X
BEAS-2B	GO:0031175	neuron projection development	BP	6	2.38095	0.0105365	4.51803	0.523026	AREG, EFHD1, FLRT3, HMGB1, MAP2, NEDD4		X
BEAS-2B	GO:0071222	cellular response to lipopolysaccharide	BP	6	2.38095	0.0171376	3.99825	0.616869	ABCA1, ANKRD1, CEBPB, SERPINE1, WNT5A, ZFP36	X	X
BEAS-2B	GO:0051056	regulation of small GTPase mediated signal transduction	BP	6	2.38095	0.0327405	3.37166	0.767955	ARHGAP26, CHN2, FGD4, ITSN1, KALRN, RHOU	X	X
BEAS-2B	GO:0071294	cellular response to zinc ion	BP	5	1.98413	9.86055e-05	19.8159	0.0601415	MT1E, MT1G, MT1M, MT1X, MT2A		X
BEAS-2B	GO:0045926	negative regulation of growth	BP	5	1.98413	9.86055e-05	19.8159	0.0601415	MT1E, MT1G, MT1M, MT1X, MT2A		X
BEAS-2B	GO:0006953	acute-phase response	BP	5	1.98413	0.00170158	9.6539	0.253341	CEBPB, PLSCR1, SAA1, SAA2, SAA2-SAA4		X
BEAS-2B	GO:0043647	inositol phosphate metabolic process	BP	5	1.98413	0.00339869	8.01069	0.314699	IMPA2, IP6K2, IP6K3, NUDT4, PLCB4		X
BEAS-2B	GO:0031490	chromatin DNA binding	MF	5	1.98413	0.00698297	6.55522	0.515468	BCL6, FOXC2, FOXO3, PER1, THRA		X
BEAS-2B	GO:0070373	negative regulation of ERK1 and ERK2 cascade	BP	5	1.98413	0.00722361	6.49142	0.47871	DMD, DUSP1, ERRFI1, KLF4, LMO3		X
BEAS-2B	GO:0009612	response to mechanical stimulus	BP	5	1.98413	0.00767028	6.38139	0.468325	KALRN, KCNK2, PPARG, PTGER4, TGFBR2		X
BEAS-2B	GO:0045732	positive regulation of protein catabolic process	BP	5	1.98413	0.00813474	6.27504	0.473872	FOXO1, NEDD4, NKD1, TIPARP, WNT5A		X
BEAS-2B	GO:0007613	memory	BP	5	1.98413	0.00911817	6.07262	0.485626	CEBPB, CNR1, KALRN, KCNK2, PTGS2		X
BEAS-2B	GO:0051384	response to glucocorticoid	BP	5	1.98413	0.0107335	5.79234	0.516775	AREG, DUSP1, GHR, HMGB1, PTGS2		X
BEAS-2B	GO:0071260	cellular response to mechanical stimulus	BP	5	1.98413	0.0144929	5.30285	0.600792	ANKRD1, KCNJ2, MMP7, PTGER4, PTGS2		X
BEAS-2B	GO:0050729	positive regulation of inflammatory response	BP	5	1.98413	0.015909	5.15756	0.623253	JAK2, PTGER4, SERPINE1, TGM2, WNT5A		X
BEAS-2B	GO:0030334	regulation of cell migration	BP	5	1.98413	0.0166485	5.08787	0.617109	JAG1, NEXN, PLXNA2, SGK1, VCL		X
BEAS-2B	GO:0007584	response to nutrient	BP	5	1.98413	0.0166485	5.08787	0.617109	ABCA1, ACSL1, CNR1, PPARG, TGFBR2		X
BEAS-2B	GO:0008144	drug binding	MF	5	1.98413	0.0176161	5.00267	0.730901	CNR1, CYP4B1, MT2A, MT3, PPARG		X
BEAS-2B	GO:0050728	negative regulation of inflammatory response	BP	5	1.98413	0.0206672	4.76585	0.655297	GATA3, KLF4, PTGER4, SAA1, ZFP36		X
BEAS-2B	GO:0005543	phospholipid binding	MF	5	1.98413	0.0263829	4.42096	0.784738	ABCA1, APOB, ARHGAP26, LPAR1, SEC14L2		X
BEAS-2B	GO:0001822	kidney development	BP	5	1.98413	0.0272181	4.37793	0.710564	ARID5B, CDKN1C, GATA3, TIPARP, WNT4		X
BEAS-2B	GO:0008584	male gonad development	BP	5	1.98413	0.0360662	4.00534	0.793061	ARID5B, GATA3, KITLG, WNT4, WNT5A		X
BEAS-2B	GO:0046854	phosphatidylinositol phosphorylation	BP	5	1.98413	0.0360662	4.00534	0.793061	IMPA2, IP6K2, IRS2, KITLG, PIK3R1		X
BEAS-2B	GO:0030182	neuron differentiation	BP	5	1.98413	0.0372758	3.96318	0.79668	CEBPB, DDIT4, NLGN4X, WNT4, WNT5A	X	X
BEAS-2B	GO:0042593	glucose homeostasis	BP	5	1.98413	0.0450197	3.72774	0.836495	CNR1, KCNB1, PDK4, PPARG, SOX4		X
BEAS-2B	GO:0051091	positive regulation of sequence-specific DNA binding transcription factor activity	BP	5	1.98413	0.0506448	3.58574	0.859343	ARID5B, JAK2, PLPP3, PPARG, RGCC		X
HBE	GO:0006351	transcription, DNA-templated	BP	15	17.0455	0.0650531	1.63087	0.999753	BCL6, CEBPD, CUX2, FOSL2, FOXQ1, HIPK2, HMGB3, KLF9, PER1, SEC14L2, TFCP2L1, TRNP1, VGLL3, ZBTB16, ZXDB			X
HBE	GO:0045944	positive regulation of transcription from RNA polymerase II promoter	BP	11	12.5	0.0150838	2.38341	0.976578	CEBPD, DCN, FOSL2, HIPK2, OVOL2, PER1, PIK3R1, RGCC, SSBP2, TLR2, TNFSF11		X	X
HBE	GO:0045892	negative regulation of transcription, DNA-templated	BP	7	7.95455	0.0284182	2.98176	0.995208	BCL6, CEBPD, GCLC, LGR4, OVOL2, PER1, ZBTB16	X	X	X
HBE	GO:0032869	cellular response to insulin stimulus	BP	6	6.81818	2.88988e-05	16.5629	0.0211867	ERRFI1, GCLC, GHR, INHBB, IRS2, PIK3R1		X	X
HBE	GO:0045087	innate immune response	BP	6	6.81818	0.0496666	2.96591	0.999474	HMGB3, LGR4, SAA1, TLR2, TREM2, TRIM35			X
HBE	GO:0019221	cytokine-mediated signaling pathway	BP	5	5.68182	0.00323183	8.11286	0.698604	DCN, FLRT3, GHR, IRAK3, TNFSF11			X
HBE	GO:0000978	RNA polymerase II core promoter proximal region sequence-specific DNA binding	MF	5	5.68182	0.0819419	3.00963	1	CEBPD, CUX2, FOSL2, PER1, SSBP2			X
