# Supplementary material for: Glucocorticoid-driven transcriptomes in human airway epithelial cells: commonalities, differences and functional insight from cell lines and primary cells
Source: BMC Med Genomics. 2019 Jan 31;12:29. doi: 10.1186/s12920-018-0467-2 (PMC6357449; doi:10.1186/s12920-018-0467-2)
Supplement: Supplementary file 8 — GO terms associated with budesonide-induced genes in A549, BEAS-2B, and HBE cells using lower stringency cut-off. Budesonide-induced genes, as defined in Fig. 3b, in A549 (268 genes), BEAS-2B (300 genes), and HBE (196 genes) were used for DAVID GO analysis. Biological processes and molecular function terms that were significantly enriched (EASE score ≤ 0.1) with each list and represented by at least 5 genes were listed. The terms that are significantly enriched following family-wide false discovery rate correction (Benjamini ≤0.05) are colored red. (XLSX 38 kb) [file 12920_2018_467_MOESM8_ESM.xlsx]

## Sheet: GO of induced genes 1.25 fold
Cell variant	GO term	GO description	Category	Count	%	P value	Fold enrichment	Benjamini	Genes	A549	B2B	HBE
A549	GO:0005515	protein binding	MF	152	53.3333	0.001845	1.18251	0.602816	ABLIM3, ADRA2A, AHNAK, AKAP12, AKAP13, ALCAM, ALOX5AP, ALPP, AMOTL2, ANGPTL4, ANKRD1, APBB2, ARL4A, ARMC8, ARRB1, BBS10, BCL6, BIRC3, C11orf54, C1orf116, CACNB2, CALD1, CAVIN2, CDKN1C, CEBPB, CEBPD, CEP70, CFLAR, CHN2, CIART, CITED2, CKB, CRYAB, CTGF, DCN, DNAJC15, DOCK4, DUSP1, EIF2AK3, EMP1, EMP2, ENOX1, ERRFI1, FAIM, FAM46B, FKBP5, FNBP1L, FOS, FOXO1, FOXO3, G0S2, GADD45A, GADD45B, GATA3, GLUL…	X	X
A549	GO:0045944	positive regulation of transcription from RNA polymerase II promoter	BP	28	9.82456	0.00121674	1.94041	0.304139	ABLIM3, ANKRD1, ARRB1, CEBPB, CEBPD, CITED2, CITED4, DCN, FOS, FOXO1, FOXO3, GATA3, HIPK2, HOXC13, IKZF2, JAG1, KLF15, KLF4, NFIA, NFKBIA, OVOL2, PER1, PIK3R1, RGCC, SERPINE1, SPX, SSBP2, THRA	X	X	X
A549	GO:0000122	negative regulation of transcription from RNA polymerase II promoter	BP	22	7.7193	0.002157	2.07728	0.348675	ANKRD1, ANKRD2, BCL6, CDKN1C, CITED2, FOXO1, FOXO3, GATA3, HIPK2, ID1, KLF4, NFIA, PER1, PER2, PRDM1, SNAI2, TBX3, TFCP2L1, TRIM29, TSC22D3, ZBTB16, ZFP36	X	X	X
A549	GO:0006915	apoptotic process	BP	19	6.66667	0.00179379	2.27812	0.367668	ARRB1, BIRC3, CFLAR, CIDEC, FAIM, FOXO1, GADD45A, GADD45B, GRAMD4, JAK2, MT3, NFKBIA, NOTCH2, PRKCD, RHOB, SGK1, TNFAIP3, TNS4, ZBTB16	X	X	X
A549	GO:0043066	negative regulation of apoptotic process	BP	17	5.96491	0.00113682	2.54005	0.334044	ANGPTL4, APBB2, BIRC3, CFLAR, CITED2, CRYAB, DUSP1, FAIM, FOXO1, ID1, MCL1, MT3, NFKBIA, NOTCH2, PIK3R1, TBX3, THBS1	X	X	X
A549	GO:0045892	negative regulation of transcription, DNA-templated	BP	17	5.96491	0.00288493	2.31608	0.349644	BCL6, CDKN1C, CEBPB, CEBPD, CIART, CITED2, FOXO1, GATA3, ID1, KLF4, MT3, OVOL2, PER1, PER2, TBX3, THRA, ZBTB16	X	X	X
A549	GO:0035556	intracellular signal transduction	BP	16	5.61404	0.000921359	2.69911	0.422517	AKAP13, APBB2, CHN2, CORO2A, CTGF, DUSP1, ITSN1, JAK2, PAG1, PLCB4, PRKCD, SGK1, STAC2, TGFBR3, TNS2, ZFP36	X	X
A549	GO:0043547	positive regulation of GTPase activity	BP	16	5.61404	0.0197228	1.92521	0.694731	AGFG2, AKAP13, ARHGEF26, ARRB1, CDC42EP3, CHN2, DOCK4, ERRFI1, FGD4, FNBP1L, IRS2, ITSN1, JAK2, KITLG, RGS2, STARD13	X	X	X
A549	GO:0043065	positive regulation of apoptotic process	BP	15	5.26316	0.000143146	3.39919	0.225719	AKAP13, ANKRD1, APBB2, BCL6, CNR1, DUSP1, FGD4, FOXO1, FOXO3, GADD45A, GADD45B, ITSN1, LPAR1, RHOB, ZBTB16	X	X	X
A549	GO:0008284	positive regulation of cell proliferation	BP	14	4.91228	0.0202925	2.04243	0.693273	ADRA2A, CTGF, EDN2, EDN3, EMP2, HIPK2, IL6R, IRS2, KRT6A, LIFR, S1PR3, TBC1D8, TBX3, THBS1	X
A549	GO:0006366	transcription from RNA polymerase II promoter	BP	14	4.91228	0.0388012	1.85531	0.814329	ARRB1, CEBPB, CEBPD, FOS, FOXO3, GATA3, HOXC13, KLF15, KLF4, NFIA, OVOL2, SSBP2, THRA, TRIM29	X	X	X
A549	GO:0045893	positive regulation of transcription, DNA-templated	BP	13	4.5614	0.0773974	1.7161	0.923512	CDKN1C, CITED2, FOS, FOXO1, FOXO3, GATA3, HIPK2, KLF4, KLF6, MT3, SEC14L2, TBX3, ZBTB16	X	X	X
A549	GO:0046982	protein heterodimerization activity	MF	13	4.5614	0.0402587	1.9107	0.946875	ABCG1, ADRA2A, BTBD11, CEBPB, CEBPD, FOS, HOMER2, IKZF2, IRAK3, KCNB1, MCL1, PIK3R1, SLC51B	X
A549	GO:0007155	cell adhesion	BP	12	4.21053	0.0759898	1.77735	0.923298	ALCAM, CTGF, EMP2, ITGA10, ITGB4, KIAA1462, KITLG, PDZD2, RHOB, SORBS2, THBS1, VCL	X	X
A549	GO:0003682	chromatin binding	MF	12	4.21053	0.0286669	2.09752	0.945447	ANKRD2, BCL6, CEBPB, CITED2, FOS, FOXO1, GATA3, HOXC13, NFIA, OVOL2, SNAI2, ZMYND8	X	X
A549	GO:0042493	response to drug	BP	11	3.85965	0.0143442	2.45994	0.629546	ACSL1, CA9, CPB2, FOS, GATA3, KCNJ11, LOX, NNMT, PLIN2, SEMA3C, THBS1	X	X
A549	GO:0008134	transcription factor binding	MF	11	3.85965	0.00896958	2.64713	0.777243	APBB2, ARRB1, CEBPB, FOS, GATA3, ID1, NFIA, NFKBIA, PER1, PIK3R1, THRA	X	X
A549	GO:0008285	negative regulation of cell proliferation	BP	11	3.85965	0.0670607	1.88844	0.907955	BCL6, GATA3, JAK2, KLF4, NDRG1, NOTCH2, PKP2, RGCC, SPRY1, TNS2, ZBTB16	X	X
A549	GO:0042981	regulation of apoptotic process	BP	10	3.50877	0.00423498	3.19173	0.418249	BCL6, BIRC3, CFLAR, CIDEC, DUSP1, INHBB, JAK2, MCL1, NDRG1, SGK1	X	X	X
A549	GO:0001525	angiogenesis	BP	9	3.15789	0.0172312	2.74374	0.670211	ANGPTL4, ANPEP, CTGF, EIF2AK3, ID1, JAG1, OVOL2, RHOB, SERPINE1	X
A549	GO:0010628	positive regulation of gene expression	BP	9	3.15789	0.03959	2.33532	0.813391	CITED2, CTGF, EIF2AK3, EPB41L4B, ID1, KLF4, MT3, PRDM1, RGCC	X	X	X
A549	GO:0001077	transcriptional activator activity, RNA polymerase II core promoter proximal region sequence-specific binding	MF	9	3.15789	0.0226524	2.60634	0.942966	CEBPB, CEBPD, FOS, GATA3, HOXC13, KLF15, KLF4, NFIA, SSBP2	X	X
A549	GO:0005096	GTPase activator activity	MF	9	3.15789	0.0522713	2.20465	0.94934	AGFG2, ARRB1, CDC42EP3, CHN2, DOCK4, ERRFI1, RGS2, STARD13, TBC1D8	X	X	X
A549	GO:0098641	cadherin binding involved in cell-cell adhesion	MF	9	3.15789	0.0626383	2.12102	0.960612	AHNAK, CALD1, FNBP1L, NDRG1, PACSIN2, PKP2, S100P, TRIM29, VCL	X
A549	GO:0003779	actin binding	MF	9	3.15789	0.0513743	2.21258	0.96298	ABLIM2, ABLIM3, CALD1, FGD4, HOMER2, KLHL4, PHACTR3, TNS4, VCL	X	X	X
A549	GO:0030036	actin cytoskeleton organization	BP	8	2.80702	0.00305485	4.18362	0.343326	ABLIM2, ABLIM3, ADRA2A, BCL6, CORO2A, FGD4, PACSIN2, PDE4DIP	X	X	X
A549	GO:0007568	aging	BP	8	2.80702	0.0109631	3.29618	0.591563	CDKN1C, CNR1, CRYAB, CTGF, DCN, FOS, FOXO3, IGFBP1	X	X	X
A549	GO:0001666	response to hypoxia	BP	8	2.80702	0.0135301	3.16204	0.637346	ANGPTL4, CA9, CITED2, CRYAB, DDIT4, MT3, TGFBR3, THBS1	X	X	X
A549	GO:0044212	transcription regulatory region DNA binding	MF	8	2.80702	0.0368561	2.56692	0.956255	ARRB1, FOS, GATA3, IKZF2, KLF15, KLF4, OVOL2, THRA	X	X	X
A549	GO:0030336	negative regulation of cell migration	BP	7	2.45614	0.00272863	5.00933	0.35846	ABHD2, CITED2, PKP2, RHOB, SERPINE1, VCL, ZMYND8	X	X	X
A549	GO:0050728	negative regulation of inflammatory response	BP	7	2.45614	0.00105904	6.02388	0.377105	GATA3, KLF4, PRKCD, PTGER4, SAA1, TNFAIP3, ZFP36	X	X
A549	GO:0051056	regulation of small GTPase mediated signal transduction	BP	7	2.45614	0.014112	3.55139	0.637927	AKAP13, CHN2, FGD4, ITSN1, RHOB, RHOBTB2, STARD13	X	X	X
A549	GO:0032496	response to lipopolysaccharide	BP	7	2.45614	0.0339263	2.90175	0.794334	CNR1, DCN, FOS, IRAK3, JAK2, PTGER4, THBD	X	X
A549	GO:0030335	positive regulation of cell migration	BP	7	2.45614	0.0540211	2.58634	0.862595	ADRA2A, IRS2, JAK2, PIK3R1, SEMA3C, SNAI2, THBS1	X
A549	GO:0042127	regulation of cell proliferation	BP	7	2.45614	0.0551125	2.57236	0.862805	BCL6, JAG1, JAK2, NDRG1, NFKBIA, SGK1, TRNP1	X	X	X
A549	GO:0030198	extracellular matrix organization	BP	7	2.45614	0.068922	2.42799	0.909987	APBB2, DCN, ITGA10, ITGB4, LOX, SERPINE1, THBS1	X	X	X
A549	GO:0030334	regulation of cell migration	BP	6	2.10526	0.00459152	5.5122	0.4019	JAG1, NEXN, PLXNA2, RHOB, SGK1, VCL	X	X
A549	GO:0071456	cellular response to hypoxia	BP	6	2.10526	0.0134642	4.24899	0.651185	ANKRD1, FOXO3, HIPK2, MT3, NDRG1, RGCC	X	X
A549	GO:0019900	kinase binding	MF	6	2.10526	0.00475586	5.46753	0.696326	CEBPB, EMP2, PER1, PRKCD, TNFAIP3, TNS2	X	X
A549	GO:0007219	Notch signaling pathway	BP	6	2.10526	0.0271102	3.54698	0.734841	JAG1, LOC100996763, NOTCH2, NOTCH2NL, S1PR3, SNAI2	X	X
A549	GO:0030168	platelet activation	BP	6	2.10526	0.0271102	3.54698	0.734841	ADRA2A, ARRB1, PIK3R1, PRKCD, RHOB, SAA1	X
A549	GO:0051726	regulation of cell cycle	BP	6	2.10526	0.035844	3.28954	0.804214	GADD45A, GADD45B, HIPK2, OVOL2, PER2, TRNP1	X		X
A549	GO:0019221	cytokine-mediated signaling pathway	BP	6	2.10526	0.0437108	3.11376	0.830497	DCN, EDN2, IL6R, IRAK3, JAK2, LIFR	X		X
A549	GO:0043524	negative regulation of neuron apoptotic process	BP	6	2.10526	0.0449127	3.09017	0.832229	CEBPB, HIPK2, ITSN1, JAK2, MT3, VSTM2L	X
A549	GO:0007204	positive regulation of cytosolic calcium ion concentration	BP	6	2.10526	0.0473754	3.04405	0.835837	EDN2, JAK2, LPAR1, PTGER4, S1PR3, SAA1	X	X
A549	GO:0030511	positive regulation of transforming growth factor beta receptor signaling pathway	BP	5	1.75439	0.000379221	14.1633	0.287445	CDKN1C, CITED2, HIPK2, TGFBR3, THBS1	X
A549	GO:0043407	negative regulation of MAP kinase activity	BP	5	1.75439	0.00183201	9.4422	0.336085	DUSP1, IRAK3, PRKCD, RGS2, SPRY1	X
A549	GO:0006953	acute-phase response	BP	5	1.75439	0.00247193	8.71587	0.35743	CEBPB, IL6R, SAA1, SAA2, SAA2-SAA4	X	X
A549	GO:0009267	cellular response to starvation	BP	5	1.75439	0.00489357	7.23232	0.402896	DNAJC15, FOXO1, GLUL, INHBB, PDK4	X	X
A549	GO:0045600	positive regulation of fat cell differentiation	BP	5	1.75439	0.00489357	7.23232	0.402896	CEBPB, SNAI2, SULT1E1, ZBTB16, ZFP36	X	X
A549	GO:0003151	outflow tract morphogenesis	BP	5	1.75439	0.0045283	7.38954	0.417658	CITED2, NEDD4, SEMA3C, TBX3, TGFBR3	X	X
A549	GO:0071333	cellular response to glucose stimulus	BP	5	1.75439	0.00701762	6.5369	0.502992	CPB2, FOXO3, IRS2, KCNB1, KCNJ11	X	X
A549	GO:0070301	cellular response to hydrogen peroxide	BP	5	1.75439	0.00967559	5.96349	0.599261	FOXO1, KLF4, PRKCD, RHOB, TNFAIP3	X
A549	GO:0070373	negative regulation of ERK1 and ERK2 cascade	BP	5	1.75439	0.0102755	5.86067	0.60262	ARRB1, DUSP1, ERRFI1, KLF4, SPRY1	X	X
A549	GO:0009612	response to mechanical stimulus	BP	5	1.75439	0.0108989	5.76134	0.606445	CITED2, DCN, INHBB, PTGER4, THBS1	X	X	X
A549	GO:0050796	regulation of insulin secretion	BP	5	1.75439	0.0167719	5.07342	0.673545	ADRA2A, CNR1, KCNB1, KCNJ11, PER2	X
A549	GO:0032088	negative regulation of NF-kappaB transcription factor activity	BP	5	1.75439	0.0203265	4.78759	0.682349	ARRB1, IRAK3, KLF4, NFKBIA, TNFAIP3	X
A549	GO:0043154	negative regulation of cysteine-type endopeptidase activity involved in apoptotic process	BP	5	1.75439	0.0184961	4.92636	0.683494	ARRB1, CRYAB, KLF4, MT3, THBS1	X
A549	GO:0009791	post-embryonic development	BP	5	1.75439	0.0222646	4.65643	0.704558	ETNK2, GATA3, PRDM1, SEMA3C, TIPARP	X	X
A549	GO:0007623	circadian rhythm	BP	5	1.75439	0.0243118	4.53225	0.725715	ID1, KLF9, PER1, PER2, SERPINE1	X	X	X
A549	GO:0060021	palate development	BP	5	1.75439	0.0253767	4.47262	0.730822	BNC2, SNAI2, TBX3, TGFBR3, TIPARP	X	X
A549	GO:0008286	insulin receptor signaling pathway	BP	5	1.75439	0.0275897	4.35794	0.731708	FOXO1, IGFBP1, IRS2, PDK4, PIK3R1	X	X
A549	GO:0032869	cellular response to insulin stimulus	BP	5	1.75439	0.0264693	4.41453	0.735948	ERRFI1, FOXO1, INHBB, IRS2, PIK3R1	X	X	X
A549	GO:0001822	kidney development	BP	5	1.75439	0.0375665	3.95255	0.811545	CDKN1C, DCN, GATA3, TIPARP, TNS2	X	X
A549	GO:0007160	cell-matrix adhesion	BP	5	1.75439	0.0432361	3.77688	0.833883	CTGF, EMP2, ITGA10, ITGB4, VCL	X	X
A549	GO:0007179	transforming growth factor beta receptor signaling pathway	BP	5	1.75439	0.0462417	3.69477	0.83472	CITED2, FOS, HIPK2, ID1, TGFBR3	X
A549	GO:0030182	neuron differentiation	BP	5	1.75439	0.050963	3.5781	0.851567	CEBPB, DDIT4, EDN3, HIPK2, ID1	X	X
A549	GO:0006936	muscle contraction	BP	5	1.75439	0.0723683	3.17681	0.916752	ANKRD2, CALD1, CRYAB, STBD1, VCL	X
A549	GO:0071356	cellular response to tumor necrosis factor	BP	5	1.75439	0.0783347	3.09017	0.922493	ANKRD1, GATA3, KCNJ11, THBS1, ZFP36	X
A549	GO:0071222	cellular response to lipopolysaccharide	BP	5	1.75439	0.0845392	3.00813	0.934218	ANKRD1, CEBPB, SERPINE1, TNFAIP3, ZFP36	X	X
A549	GO:0045766	positive regulation of angiogenesis	BP	5	1.75439	0.0888053	2.95582	0.940201	ANGPTL4, HIPK2, RHOB, SERPINE1, THBS1	X		X
A549	GO:0001078	transcriptional repressor activity, RNA polymerase II core promoter proximal region sequence-specific binding	MF	5	1.75439	0.0791862	3.07856	0.976479	FOXO1, GATA3, PRDM1, SNAI2, TBX3	X
BEAS-2B	GO:0005515	protein binding	MF	168	52.8302	0.00594393	1.14884	0.582464	ABCA1, ABLIM3, AKAP12, AKAP13, ALCAM, ALOX5AP, ALPP, ANKRD1, APBB2, APOB, AREG, ARHGAP26, ARID5B, ARMC8, BBS10, BCL6, BIRC3, CACNB2, CALD1, CD200, CD59, CDKN1C, CEBPB, CEBPD, CFLAR, CHN2, CIART, CITED2, COL8A1, CTGF, DKK1, DMBT1, DMD, DNAJB4, DNAJC15, DUSP1, DUSP23, ELF1, EMP2, ENOX1, EPS8, ERRFI1, EYA4, FAIM, FAM218A, FAM46B, FBXO32, FKBP5, FLRT3, FNBP1L, FOS, FOSL2, FOXC2, FOXN3, FOXO1, FOXO3, …	X	X
BEAS-2B	GO:0046872	metal ion binding	MF	46	14.4654	0.0341716	1.33564	0.81693	AGFG2, AKAP13, AOX1, BCL6, BNC2, CACNA2D3, CHN2, DMRTA1, ENDOD1, EYA4, FGD4, GALNT15, GMPR, HIVEP3, IKZF2, ITGA10, JAK2, KALRN, KLF15, KLF4, KLF6, KLF9, MOB3B, MT1E, MT1G, MT1M, MT1X, MT2A, MT3, NPAS2, NUDT4, PDE6A, PLA2G4A, PRDM1, PRKCD, PTGS2, RHOU, RIMKLB, TGFBR2, TGM2, TIPARP, TNS2, ZBTB16, ZFP36, ZNF469, ZNF608		X
BEAS-2B	GO:0045944	positive regulation of transcription from RNA polymerase II promoter	BP	32	10.0629	0.000445839	1.95625	0.113388	ABLIM3, ANKRD1, CEBPB, CEBPD, CITED2, CITED4, ELF1, FOS, FOSL2, FOXC2, FOXO1, FOXO3, GATA3, HMGB1, IKZF2, JAG1, KLF15, KLF4, LPIN1, NCOA3, NFIA, NFKBIA, NPAS2, PER1, PIK3R1, PLSCR1, PPARG, RGCC, SERPINE1, SOX4, THRA, WNT5A	X	X	X
BEAS-2B	GO:0008270	zinc ion binding	MF	30	9.43396	0.0196237	1.5417	0.724846	ABLIM2, ABLIM3, ALPP, ANPEP, BIRC3, BNC2, CA9, CPM, DMD, GATA3, KLF4, LMO3, MMP7, MT1E, MT1G, MT1M, MT1X, MT2A, MT3, NANOS1, NEBL, PPARG, RNF150, SH3RF3, SP110, THRA, TNFAIP3, ZFAND5, ZMYND8, ZNF385B		X
BEAS-2B	GO:0003700	transcription factor activity, sequence-specific DNA binding	MF	28	8.80503	0.00539877	1.75036	0.652648	BCL6, CEBPB, CEBPD, CITED2, DMRTA1, ELF1, FOS, FOSL2, FOXC2, FOXL1, FOXN3, FOXO3, GATA3, HIVEP3, HMGB1, IKZF2, KLF4, KLF9, NFIA, NPAS2, PPARG, PRDM1, SOX4, TFCP2L1, THRA, TSC22D3, WNT5A, ZBTB16		X	X
BEAS-2B	GO:0043065	positive regulation of apoptotic process	BP	23	7.2327	6.33713e-09	4.59781	1.36818e-05	AKAP13, ALDH1A3, ANKRD1, APBB2, BCL6, CNR1, DUSP1, FGD4, FOXO1, FOXO3, FRZB, GADD45A, GADD45B, HMGB1, IP6K2, ITSN1, KALRN, LPAR1, PTGS2, RPS6KA2, SOX4, TGM2, ZBTB16	X	X	X
BEAS-2B	GO:0000122	negative regulation of transcription from RNA polymerase II promoter	BP	22	6.91824	0.00907597	1.83246	0.449264	ANKRD1, ANKRD2, ARID5B, BCL6, CDKN1C, CITED2, DKK1, FOXC2, FOXO1, FOXO3, GATA3, HMGB1, KLF4, NFIA, PER1, PER2, PPARG, PRDM1, TFCP2L1, TSC22D3, ZBTB16, ZFP36	X	X	X
BEAS-2B	GO:0045893	positive regulation of transcription, DNA-templated	BP	21	6.60377	0.000403558	2.44544	0.135188	CDKN1C, CITED2, ELF1, FOS, FOXC2, FOXN3, FOXO1, FOXO3, GATA3, HIVEP3, KLF4, KLF6, MT3, NCOA3, NPAS2, PPARG, SEC14L2, SOX4, WNT4, WNT5A, ZBTB16	X	X	X
BEAS-2B	GO:0045892	negative regulation of transcription, DNA-templated	BP	20	6.28931	0.000708723	2.40366	0.129904	ARID5B, BCL6, CDKN1C, CEBPB, CEBPD, CIART, CITED2, FOXN3, FOXO1, GATA3, GCLC, KLF4, MT3, PER1, PER2, PPARG, THRA, WNT4, WNT5A, ZBTB16	X	X	X
BEAS-2B	GO:0043066	negative regulation of apoptotic process	BP	19	5.97484	0.0006295	2.5043	0.127115	ACTC1, APBB2, BIRC3, CD59, CFLAR, CITED2, DUSP1, FAIM, FCMR, FOXO1, GCLC, MCL1, MT3, NFKBIA, NOTCH2, PIK3R1, TGM2, THBS1, WNT5A	X	X	X
BEAS-2B	GO:0006915	apoptotic process	BP	18	5.66038	0.0141011	1.90385	0.544418	ACTC1, BIRC3, CFLAR, FAIM, FOXO1, GADD45A, GADD45B, JAK2, MAP3K8, MT3, NFKBIA, NOTCH2, PLSCR1, PRKCD, SGK1, TGFBR2, TNFAIP3, ZBTB16	X	X	X
BEAS-2B	GO:0043547	positive regulation of GTPase activity	BP	17	5.34591	0.0271827	1.80445	0.66102	AGFG2, AKAP13, ARHGAP26, ARHGEF26, CDC42EP3, CHN2, ERRFI1, FGD4, FNBP1L, IRS2, ITSN1, JAK2, KALRN, KITLG, RGS2, STARD13, WNT4	X	X	X
BEAS-2B	GO:0035556	intracellular signal transduction	BP	16	5.03145	0.00315038	2.381	0.277039	AKAP13, APBB2, CHN2, CTGF, DUSP1, ITSN1, JAK2, KALRN, NUDT4, PLCB4, PRKCD, RPS6KA2, SGK1, TGFBR3, TNS2, ZFP36	X	X
BEAS-2B	GO:0007275	multicellular organism development	BP	16	5.03145	0.0283982	1.84173	0.670671	CHST2, DMBT1, EYA4, FOXL1, FRZB, GADD45B, HIVEP3, HLX, JAG1, LOC100996763, MCL1, MN1, NOTCH2, NOTCH2NL, WNT4, WNT5A		X
BEAS-2B	GO:0008285	negative regulation of cell proliferation	BP	15	4.71698	0.00667921	2.27165	0.414846	BCL6, FRZB, GATA3, JAK2, KLF4, NDRG1, NOTCH2, PKP2, PTGS2, RERG, RGCC, RPS6KA2, SOX4, TNS2, ZBTB16	X	X
BEAS-2B	GO:0007155	cell adhesion	BP	15	4.71698	0.0220518	1.95985	0.633212	ALCAM, COL8A1, CTGF, EMP2, ITGA10, ITGB4, KITLG, NECTIN4, NLGN4X, PCDH10, PCDH18, PDZD2, SVEP1, THBS1, VCL	X	X
BEAS-2B	GO:0043565	sequence-specific DNA binding	MF	15	4.71698	0.0508169	1.73962	0.834331	BCL6, CEBPB, ELF1, FOS, FOSL2, FOXC2, FOXL1, FOXN3, FOXO1, FOXO3, HIVEP3, HLX, PPARG, TFCP2L1, THRA		X	X
BEAS-2B	GO:0042493	response to drug	BP	14	4.40252	0.00178172	2.76184	0.192569	ABCA1, ACSL1, ACTC1, CA9, FOS, GATA3, LOX, NNMT, PLIN2, PPARG, PTGS2, SEMA3C, TGFBR2, THBS1	X	X
BEAS-2B	GO:0030154	cell differentiation	BP	14	4.40252	0.0457193	1.81732	0.803994	ABCB5, ABHD5, ANPEP, CITED2, CTGF, ELF1, EYA4, FOXN3, GADD45B, HLX, JAK2, LOC100996763, NOTCH2NL, TGFBR2		X
BEAS-2B	GO:0006366	transcription from RNA polymerase II promoter	BP	14	4.40252	0.0880627	1.63665	0.941762	CEBPB, CEBPD, ELF1, FOS, FOXC2, FOXO3, GATA3, HIVEP3, KLF15, KLF4, NFIA, PLSCR1, SOX4, THRA	X	X	X
BEAS-2B	GO:0007507	heart development	BP	12	3.77358	0.000249895	3.93255	0.126195	AKAP13, CITED2, FLRT3, FOXC2, FOXL1, GATA3, LOX, PKP2, PPARG, RPS6KA2, SOX4, TGFBR2		X	X
BEAS-2B	GO:0003682	chromatin binding	MF	12	3.77358	0.0621823	1.84373	0.861938	ANKRD2, BCL6, CEBPB, CITED2, FOS, FOSL2, FOXO1, GATA3, NFIA, PPARG, SVEP1, ZMYND8	X	X
BEAS-2B	GO:0010628	positive regulation of gene expression	BP	11	3.45912	0.0124847	2.51788	0.510217	ACTC1, APOB, CITED2, CTGF, KLF4, MT3, NCOA3, PLSCR1, PRDM1, RGCC, RPS6KA2	X	X	X
BEAS-2B	GO:0001077	transcriptional activator activity, RNA polymerase II core promoter proximal region sequence-specific binding	MF	11	3.45912	0.0061716	2.80009	0.515943	CEBPB, CEBPD, ELF1, FOS, FOXC2, GATA3, KLF15, KLF4, NFIA, PLSCR1, SOX4	X	X
BEAS-2B	GO:0044212	transcription regulatory region DNA binding	MF	11	3.45912	0.00301234	3.10245	0.586852	ARID5B, FOS, FOXC2, GATA3, HIVEP3, IKZF2, KLF15, KLF4, PPARG, THRA, WNT5A	X	X	X
BEAS-2B	GO:0008134	transcription factor binding	MF	11	3.45912	0.0205061	2.32684	0.703038	APBB2, CEBPB, FOS, GATA3, HMGB1, NFIA, NFKBIA, PER1, PIK3R1, PPARG, THRA	X	X
BEAS-2B	GO:0006954	inflammatory response	BP	11	3.45912	0.0999559	1.7406	0.955605	AOX1, BCL6, CEBPB, CHST2, FOS, HMGB1, PTGER2, PTGS2, S1PR3, THBS1, TNFAIP3		X
BEAS-2B	GO:0007568	aging	BP	10	3.14465	0.00178159	3.63463	0.202652	CDKN1C, CNR1, CTGF, DMD, FOS, FOXO3, GCLC, IGFBP1, MMP7, TGFBR2	X	X	X
BEAS-2B	GO:0042127	regulation of cell proliferation	BP	10	3.14465	0.00384268	3.2417	0.303303	BCL6, JAG1, JAK2, NDRG1, NFKBIA, PLA2G4A, PTGER2, SGK1, TGFBR2, TRNP1	X	X	X
BEAS-2B	GO:0005096	GTPase activator activity	MF	10	3.14465	0.0436271	2.15322	0.804803	AGFG2, ARHGAP26, CDC42EP3, CHN2, ERRFI1, KALRN, RGS2, STARD13, TBC1D12, TBC1D8	X	X	X
BEAS-2B	GO:0003779	actin binding	MF	10	3.14465	0.0428089	2.16096	0.818999	ABLIM2, ABLIM3, CALD1, DAAM2, DMD, EPS8, FGD4, KLHL4, TNNT2, VCL	X	X	X
BEAS-2B	GO:0030036	actin cytoskeleton organization	BP	9	2.83019	0.00148727	4.15187	0.181955	ABLIM2, ABLIM3, ARHGAP26, BCL6, DAAM2, FGD4, PACSIN2, PDE4DIP, RHOU	X	X	X
BEAS-2B	GO:0051056	regulation of small GTPase mediated signal transduction	BP	9	2.83019	0.00180291	4.02793	0.185395	AKAP13, ARHGAP26, CHN2, FGD4, ITSN1, KALRN, RHOBTB2, RHOU, STARD13	X	X	X
BEAS-2B	GO:0042981	regulation of apoptotic process	BP	9	2.83019	0.0262568	2.534	0.661722	BCL6, BIRC3, CFLAR, DUSP1, GAS1, JAK2, MCL1, NDRG1, SGK1	X	X	X
BEAS-2B	GO:0032869	cellular response to insulin stimulus	BP	8	2.51572	0.000289011	6.2308	0.117338	ERRFI1, FOXO1, GCLC, GHR, IRS2, LPIN1, PIK3R1, PPARG	X	X	X
BEAS-2B	GO:0032496	response to lipopolysaccharide	BP	8	2.51572	0.0198911	2.92544	0.618617	APOB, CNR1, FOS, JAK2, PTGER2, PTGER4, PTGS2, THBD	X	X
BEAS-2B	GO:0090090	negative regulation of canonical Wnt signaling pathway	BP	8	2.51572	0.019306	2.94338	0.624245	DKK1, FOXO1, FOXO3, FRZB, IGFBP1, NKD1, WNT4, WNT5A		X	X
BEAS-2B	GO:0001666	response to hypoxia	BP	8	2.51572	0.0250281	2.78937	0.658021	CA9, CITED2, DDIT4, MT3, PLAT, TGFBR2, TGFBR3, THBS1	X	X	X
BEAS-2B	GO:0008201	heparin binding	MF	8	2.51572	0.0174787	3.00374	0.725179	APOB, CRISPLD2, CTGF, MMP7, NAV2, SAA1, TGFBR3, THBS1		X
BEAS-2B	GO:0030198	extracellular matrix organization	BP	8	2.51572	0.0456723	2.44781	0.808828	APBB2, COL8A1, CRISPLD2, ITGA10, ITGB4, LOX, SERPINE1, THBS1	X	X	X
BEAS-2B	GO:0004872	receptor activity	MF	8	2.51572	0.0702912	2.21474	0.881814	ANPEP, CD1D, CD200, ITGB4, NECTIN4, NLGN4X, NOTCH2, THBD		X
BEAS-2B	GO:0009612	response to mechanical stimulus	BP	7	2.20126	0.000429251	7.11525	0.124029	CITED2, KALRN, KCNK2, PPARG, PTGER4, TGFBR2, THBS1	X	X	X
BEAS-2B	GO:0050727	regulation of inflammatory response	BP	7	2.20126	0.000612456	6.66349	0.136677	BCL6, BIRC3, IL1R1, JAK2, PTGS2, SLC7A2, TNFAIP3		X
BEAS-2B	GO:0071260	cellular response to mechanical stimulus	BP	7	2.20126	0.00115595	5.91268	0.163365	ANKRD1, GADD45A, GCLC, KCNJ2, MMP7, PTGER4, PTGS2		X
BEAS-2B	GO:0009791	post-embryonic development	BP	7	2.20126	0.0013366	5.75068	0.175114	APOB, ARID5B, ETNK2, GATA3, PRDM1, SEMA3C, TIPARP	X	X
BEAS-2B	GO:0050728	negative regulation of inflammatory response	BP	7	2.20126	0.00200942	5.31392	0.195179	GATA3, KLF4, PRKCD, PTGER4, SAA1, TNFAIP3, ZFP36	X	X
BEAS-2B	GO:0071456	cellular response to hypoxia	BP	7	2.20126	0.00530763	4.37292	0.368456	ANKRD1, FOXO3, KCNK2, MT3, NDRG1, PTGS2, RGCC	X	X
BEAS-2B	GO:0071222	cellular response to lipopolysaccharide	BP	7	2.20126	0.0114716	3.71504	0.499402	ABCA1, ANKRD1, CEBPB, SERPINE1, TNFAIP3, WNT5A, ZFP36	X	X
BEAS-2B	GO:0007219	Notch signaling pathway	BP	7	2.20126	0.0124327	3.65043	0.518098	FOXC2, JAG1, LOC100996763, NOTCH2, NOTCH2NL, S1PR3, TGFBR2	X	X
BEAS-2B	GO:0030308	negative regulation of cell growth	BP	7	2.20126	0.0156538	3.46942	0.56431	APBB2, BCL6, FRZB, IP6K2, MT3, PPARG, RERG		X	X
BEAS-2B	GO:0007204	positive regulation of cytosolic calcium ion concentration	BP	7	2.20126	0.0245213	3.13284	0.657687	HMGB1, JAK2, LPAR1, PTGER2, PTGER4, S1PR3, SAA1	X	X
BEAS-2B	GO:0001701	in utero embryonic development	BP	7	2.20126	0.0922248	2.24492	0.947254	APOB, EPB41L5, ETNK2, GATA3, MYO1E, TGFBR2, ZFAND5		X
BEAS-2B	GO:0048008	platelet-derived growth factor receptor signaling pathway	BP	6	1.88679	0.000104618	12.4079	0.106796	ARID5B, JAK2, MYO1E, PLAT, TIPARP, ZFAND5		X
BEAS-2B	GO:0045165	cell fate commitment	BP	6	1.88679	0.00095936	7.82236	0.1586	GAS1, GATA3, PPARG, PRDM1, WNT4, WNT5A		X
BEAS-2B	GO:0045600	positive regulation of fat cell differentiation	BP	6	1.88679	0.00105919	7.65593	0.161382	CEBPB, FRZB, LMO3, PPARG, ZBTB16, ZFP36	X	X
BEAS-2B	GO:0045732	positive regulation of protein catabolic process	BP	6	1.88679	0.00316627	5.99714	0.267447	FOXO1, NEDD4, NKD1, TIPARP, TNFAIP3, WNT5A		X
BEAS-2B	GO:0007584	response to nutrient	BP	6	1.88679	0.00774448	4.86255	0.428513	ABCA1, ACSL1, CNR1, GCLC, PPARG, TGFBR2		X
BEAS-2B	GO:0060021	palate development	BP	6	1.88679	0.00864841	4.73459	0.453893	ARID5B, BNC2, TGFBR2, TGFBR3, TIPARP, WNT5A	X	X
BEAS-2B	GO:0008286	insulin receptor signaling pathway	BP	6	1.88679	0.00962282	4.61319	0.458823	FOXC2, FOXO1, IGFBP1, IRS2, PDK4, PIK3R1	X	X
BEAS-2B	GO:0001822	kidney development	BP	6	1.88679	0.0142741	4.18405	0.539755	ARID5B, CDKN1C, GATA3, TIPARP, TNS2, WNT4	X	X
BEAS-2B	GO:0019900	kinase binding	MF	6	1.88679	0.00813177	4.80598	0.549524	CEBPB, EMP2, PER1, PRKCD, TNFAIP3, TNS2	X	X
BEAS-2B	GO:0015293	symporter activity	MF	6	1.88679	0.00152561	7.06762	0.591266	SLC16A12, SLC16A14, SLC22A5, SLC25A18, SLC38A4, SLC45A1		X
BEAS-2B	GO:0008584	male gonad development	BP	6	1.88679	0.0202378	3.82796	0.616954	ARID5B, CITED2, GATA3, KITLG, WNT4, WNT5A		X
BEAS-2B	GO:0030336	negative regulation of cell migration	BP	6	1.88679	0.0210819	3.78767	0.624228	CITED2, PKP2, SERPINE1, VCL, WNT4, ZMYND8	X	X	X
BEAS-2B	GO:0031175	neuron projection development	BP	6	1.88679	0.0256457	3.59829	0.659957	AREG, EFHD1, FLRT3, HMGB1, MAP2, NEDD4		X
BEAS-2B	GO:0005178	integrin binding	MF	6	1.88679	0.0306071	3.43284	0.809099	CTGF, EMP2, PLPP3, S1PR3, THBS1, TSPAN8		X
BEAS-2B	GO:0007050	cell cycle arrest	BP	6	1.88679	0.0862988	2.55198	0.943045	APBB2, CDKN1C, GADD45A, GAS1, NOTCH2, THBS1		X
BEAS-2B	GO:0071294	cellular response to zinc ion	BP	5	1.57233	0.000237434	15.782	0.157089	MT1E, MT1G, MT1M, MT1X, MT2A		X
BEAS-2B	GO:0045926	negative regulation of growth	BP	5	1.57233	0.000237434	15.782	0.157089	MT1E, MT1G, MT1M, MT1X, MT2A		X
BEAS-2B	GO:0006953	acute-phase response	BP	5	1.57233	0.00388336	7.68864	0.295327	CEBPB, PLSCR1, SAA1, SAA2, SAA2-SAA4	X	X
BEAS-2B	GO:0032147	activation of protein kinase activity	BP	5	1.57233	0.00650968	6.66349	0.418603	EMP2, HMGB1, PRKCD, RGCC, TGFBR2		X
BEAS-2B	GO:0003151	outflow tract morphogenesis	BP	5	1.57233	0.00703829	6.51863	0.419938	CITED2, NEDD4, SEMA3C, TGFBR2, TGFBR3	X	X
BEAS-2B	GO:0051591	response to cAMP	BP	5	1.57233	0.00703829	6.51863	0.419938	AREG, DUSP1, FOS, PER1, THBD		X
BEAS-2B	GO:0043647	inositol phosphate metabolic process	BP	5	1.57233	0.00759448	6.37994	0.43309	IMPA2, IP6K2, IP6K3, NUDT4, PLCB4		X
BEAS-2B	GO:0009267	cellular response to starvation	BP	5	1.57233	0.00759448	6.37994	0.43309	DNAJC15, FOXO1, GLUL, PDK4, WNT4	X	X
BEAS-2B	GO:0031100	organ regeneration	BP	5	1.57233	0.00759448	6.37994	0.43309	LPIN1, NNMT, PPARG, TGFBR2, TGFBR3		X
BEAS-2B	GO:0035914	skeletal muscle cell differentiation	BP	5	1.57233	0.00879192	6.11953	0.44888	ANKRD1, ANKRD2, CITED2, FOS, HIVEP3		X
BEAS-2B	GO:0071333	cellular response to glucose stimulus	BP	5	1.57233	0.0108088	5.76648	0.488484	FOXO3, GCLC, IRS2, KCNB1, SOX4	X	X
BEAS-2B	GO:0070373	negative regulation of ERK1 and ERK2 cascade	BP	5	1.57233	0.0156846	5.16995	0.55632	DMD, DUSP1, ERRFI1, KLF4, LMO3	X	X
BEAS-2B	GO:0007613	memory	BP	5	1.57233	0.0195945	4.83641	0.621301	CEBPB, CNR1, KALRN, KCNK2, PTGS2		X
BEAS-2B	GO:0051384	response to glucocorticoid	BP	5	1.57233	0.0228884	4.61319	0.639481	AREG, DUSP1, GHR, HMGB1, PTGS2		X
BEAS-2B	GO:0043627	response to estrogen	BP	5	1.57233	0.0228884	4.61319	0.639481	CITED2, CITED4, GATA3, PPARG, TGFBR2		X
BEAS-2B	GO:0009749	response to glucose	BP	5	1.57233	0.0264998	4.40966	0.65829	CTGF, GLUL, IRS2, TGFBR2, THBS1		X
BEAS-2B	GO:0050729	positive regulation of inflammatory response	BP	5	1.57233	0.0332381	4.10763	0.722064	JAK2, PTGER4, SERPINE1, TGM2, WNT5A		X
BEAS-2B	GO:0030334	regulation of cell migration	BP	5	1.57233	0.0346949	4.05212	0.731371	JAG1, NEXN, PLXNA2, SGK1, VCL	X	X
BEAS-2B	GO:0001889	liver development	BP	5	1.57233	0.0346949	4.05212	0.731371	ARID5B, CITED2, HLX, TGFBR3, WNT4		X
BEAS-2B	GO:0031490	chromatin DNA binding	MF	5	1.57233	0.015597	5.17886	0.731788	BCL6, FOXC2, FOXO3, PER1, THRA		X
BEAS-2B	GO:0000976	transcription regulatory region sequence-specific DNA binding	MF	5	1.57233	0.015597	5.17886	0.731788	CIART, GATA3, PER2, SOX4, THRA		X
BEAS-2B	GO:0007623	circadian rhythm	BP	5	1.57233	0.0361883	3.9981	0.740449	KLF9, NPAS2, PER1, PER2, SERPINE1	X	X	X
BEAS-2B	GO:0030324	lung development	BP	5	1.57233	0.0377183	3.94549	0.749297	CRISPLD2, CTGF, HMGB1, LOX, WNT5A		X
BEAS-2B	GO:0035023	regulation of Rho protein signal transduction	BP	5	1.57233	0.0459185	3.70194	0.800291	AKAP13, ARHGEF26, FGD4, ITSN1, KALRN		X
BEAS-2B	GO:0005089	Rho guanyl-nucleotide exchange factor activity	MF	5	1.57233	0.0390807	3.90096	0.811494	AKAP13, ARHGEF26, FGD4, ITSN1, KALRN		X
BEAS-2B	GO:0008144	drug binding	MF	5	1.57233	0.0375214	3.95229	0.82163	CNR1, CYP4B1, MT2A, MT3, PPARG		X
BEAS-2B	GO:0030165	PDZ domain binding	MF	5	1.57233	0.0547572	3.49272	0.840117	LPAR1, NKD1, SHISA9, SLC22A5, TGFBR3		X
BEAS-2B	GO:0005543	phospholipid binding	MF	5	1.57233	0.0547572	3.49272	0.840117	ABCA1, APOB, ARHGAP26, LPAR1, SEC14L2		X
BEAS-2B	GO:0007160	cell-matrix adhesion	BP	5	1.57233	0.0629771	3.33175	0.888568	CTGF, EMP2, ITGA10, ITGB4, VCL	X	X
BEAS-2B	GO:0032355	response to estradiol	BP	5	1.57233	0.0650524	3.29513	0.892925	AREG, CTGF, DUSP1, GHR, PTGS2		X
BEAS-2B	GO:0046854	phosphatidylinositol phosphorylation	BP	5	1.57233	0.07149	3.18997	0.911645	IMPA2, IP6K2, IRS2, KITLG, PIK3R1		X	X
BEAS-2B	GO:0030182	neuron differentiation	BP	5	1.57233	0.0737057	3.15639	0.915175	CEBPB, DDIT4, NLGN4X, WNT4, WNT5A	X	X
BEAS-2B	GO:0042593	glucose homeostasis	BP	5	1.57233	0.0877174	2.96888	0.943447	CNR1, KCNB1, PDK4, PPARG, SOX4		X
BEAS-2B	GO:0051091	positive regulation of sequence-specific DNA binding transcription factor activity	BP	5	1.57233	0.0977216	2.85578	0.954203	ARID5B, JAK2, PLPP3, PPARG, RGCC		X
HBE	GO:0006351	transcription, DNA-templated	BP	30	15.1515	0.0383911	1.43954	0.874966	ABLIM2, ABLIM3, BCL6, CEBPD, CIART, CIDEC, CITED2, CUX2, FOSL2, FOXN3, FOXQ1, HIPK2, HMGB3, IKZF2, KLF9, LMO3, LPIN1, MN1, NCOA3, NFIA, NPAS2, PER1, PER2, SEC14L2, TFCP2L1, THRA, TRNP1, VGLL3, ZBTB16, ZXDB			X
HBE	GO:0045944	positive regulation of transcription from RNA polymerase II promoter	BP	26	13.1313	4.05928e-05	2.4863	0.0286862	ABLIM3, CEBPD, CITED2, DCN, ELF1, FOSL2, FOXO3, HIPK2, IKZF2, KLF15, KLF4, LPIN1, NCOA3, NFIA, NFKBIA, NPAS2, OVOL2, PER1, PIK3R1, RGCC, SERPINE1, SSBP2, THRA, TLR2, TNFSF11, WNT5A	X	X	X
HBE	GO:0003700	transcription factor activity, sequence-specific DNA binding	MF	20	10.101	0.00585736	1.97372	0.895215	BCL6, CEBPD, CITED2, ELF1, FOSL2, FOXN3, FOXO3, HIVEP3, IKZF2, KLF4, KLF9, MYCL, NFIA, NPAS2, TFCP2L1, THRA, TRIM29, TSC22D3, WNT5A, ZBTB16		X	X
HBE	GO:0045892	negative regulation of transcription, DNA-templated	BP	17	8.58586	8.44231e-05	3.19593	0.0395525	BCL6, CDKN1C, CEBPD, CIART, CITED2, FOXN3, GCLC, KLF4, LGR4, MT3, OVOL2, PER1, PER2, THRA, WNT4, WNT5A, ZBTB16	X	X	X
HBE	GO:0045893	positive regulation of transcription, DNA-templated	BP	17	8.58586	0.000121677	3.09664	0.042686	CD86, CDKN1C, CITED2, ELF1, FOXN3, FOXO3, HIPK2, HIVEP3, KLF4, LGR4, MT3, NCOA3, NPAS2, SEC14L2, WNT4, WNT5A, ZBTB16	X	X	X
HBE	GO:0006915	apoptotic process	BP	16	8.08081	0.00105941	2.6472	0.223791	BIRC3, CIDEC, FAIM, GADD45A, GADD45B, MAP3K8, MT3, NFKBIA, RHOB, SEMA6A, SGK1, TGFBR2, TLR2, TNS4, TRIM35, ZBTB16	X	X	X
HBE	GO:0000122	negative regulation of transcription from RNA polymerase II promoter	BP	15	7.57576	0.0212202	1.95438	0.737439	BCL6, CDKN1C, CITED2, CUX2, DKK1, FOXO3, HIPK2, KLF4, NFIA, PER1, PER2, TFCP2L1, TRIM29, TSC22D3, ZBTB16	X	X	X
HBE	GO:0043065	positive regulation of apoptotic process	BP	14	7.07071	1.93333e-05	4.3778	0.0273435	AKAP13, APBB2, BCL6, DUSP1, FGD4, FOXO3, FRZB, GADD45A, GADD45B, IP6K2, RHOB, RPS6KA2, TRIM35, ZBTB16	X	X	X
HBE	GO:0043547	positive regulation of GTPase activity	BP	13	6.56566	0.0174242	2.15846	0.6989	AGFG2, AKAP13, ARHGAP24, ARHGEF26, ERRFI1, FAM13A, FGD4, FNBP1L, IRS2, KITLG, RGS2, STARD13, WNT4	X	X	X
HBE	GO:0043066	negative regulation of apoptotic process	BP	12	6.06061	0.00933509	2.47411	0.592056	APBB2, BIRC3, CITED2, CRYAB, DUSP1, FAIM, FCMR, GCLC, MT3, NFKBIA, PIK3R1, WNT5A	X	X	X
HBE	GO:0006366	transcription from RNA polymerase II promoter	BP	11	5.55556	0.0469652	2.01152	0.899677	CEBPD, ELF1, FOXO3, HIVEP3, KLF15, KLF4, NFIA, OVOL2, SSBP2, THRA, TRIM29	X	X	X
HBE	GO:0043565	sequence-specific DNA binding	MF	10	5.05051	0.0954922	1.83083	0.999551	BCL6, CUX2, ELF1, FOSL2, FOXN3, FOXO3, FOXQ1, HIVEP3, TFCP2L1, THRA		X	X
HBE	GO:0010628	positive regulation of gene expression	BP	9	4.54545	0.00691405	3.22248	0.563557	CITED2, CUX2, EPB41L4B, KLF4, MT3, NCOA3, RGCC, RPS6KA2, TLR2	X	X	X
HBE	GO:0003779	actin binding	MF	9	4.54545	0.00913044	3.07027	0.828144	ABLIM2, ABLIM3, EPS8, FGD4, KLHL4, MYOT, PHACTR3, TNNT2, TNS4	X	X	X
HBE	GO:0001666	response to hypoxia	BP	8	4.0404	0.00240978	4.36326	0.389975	CITED2, CRYAB, DDIT4, MT3, POSTN, TGFBR2, TGFBR3, TLR2	X	X	X
HBE	GO:0008283	cell proliferation	BP	8	4.0404	0.0951192	2.05049	0.979221	CITED2, DDIT4, EPS8, GLUL, IRS2, KITLG, MT3, PDPN			X
HBE	GO:0032869	cellular response to insulin stimulus	BP	7	3.53535	0.000165793	8.52819	0.0464403	ERRFI1, GCLC, GHR, INHBB, IRS2, LPIN1, PIK3R1	X	X	X
HBE	GO:0051056	regulation of small GTPase mediated signal transduction	BP	7	3.53535	0.00305882	4.90053	0.42255	AKAP13, ARHGAP24, FAM13A, FGD4, RHOB, RHOU, STARD13	X	X	X
HBE	GO:0007568	aging	BP	7	3.53535	0.00831339	3.97982	0.574754	CD86, CDKN1C, CRYAB, DCN, FOXO3, GCLC, TGFBR2	X	X	X
HBE	GO:0007420	brain development	BP	7	3.53535	0.0158787	3.45616	0.682614	B3GNT5, CTTNBP2, DDIT4, IRS2, MT3, PCDH18, TGFBR2			X
HBE	GO:0042981	regulation of apoptotic process	BP	7	3.53535	0.026147	3.08296	0.794657	BCL6, BIRC3, CIDEC, DUSP1, GAS1, INHBB, SGK1	X	X	X
HBE	GO:0044212	transcription regulatory region DNA binding	MF	7	3.53535	0.0249697	3.11671	0.960706	HIVEP3, IKZF2, KLF15, KLF4, OVOL2, THRA, WNT5A	X	X	X
HBE	GO:0005096	GTPase activator activity	MF	7	3.53535	0.0738641	2.37942	0.999368	AGFG2, ARHGAP24, ERRFI1, FAM13A, RGS2, STARD13, TBC1D8	X	X	X
HBE	GO:0030336	negative regulation of cell migration	BP	6	3.0303	0.00339846	5.92485	0.386251	ABHD2, CITED2, RHOB, SERPINE1, WNT4, ZMYND8	X	X	X
HBE	GO:0051726	regulation of cell cycle	BP	6	3.0303	0.0103437	4.5392	0.563227	GADD45A, GADD45B, HIPK2, OVOL2, PER2, TRNP1	X		X
HBE	GO:0030308	negative regulation of cell growth	BP	6	3.0303	0.00936578	4.65174	0.569739	APBB2, BCL6, CRYAB, FRZB, IP6K2, MT3		X	X
HBE	GO:0030036	actin cytoskeleton organization	BP	6	3.0303	0.0125052	4.32969	0.613169	ABLIM2, ABLIM3, BCL6, FGD4, PDE4DIP, RHOU	X	X	X
HBE	GO:0042127	regulation of cell proliferation	BP	6	3.0303	0.0479166	3.04249	0.896832	BCL6, NFKBIA, PTGER2, SGK1, TGFBR2, TRNP1	X	X	X
HBE	GO:0007507	heart development	BP	6	3.0303	0.045485	3.07574	0.899933	AKAP13, CITED2, FLRT3, LOX, RPS6KA2, TGFBR2		X	X
HBE	GO:0030198	extracellular matrix organization	BP	6	3.0303	0.0578491	2.87174	0.918999	APBB2, DCN, ITGA10, LOX, POSTN, SERPINE1	X	X	X
HBE	GO:0009612	response to mechanical stimulus	BP	5	2.52525	0.00352874	7.95	0.369242	CITED2, DCN, INHBB, POSTN, TGFBR2	X	X	X
HBE	GO:0032922	circadian regulation of gene expression	BP	5	2.52525	0.00311318	8.22895	0.39153	CIART, LGR4, NPAS2, PER1, PER2			X
HBE	GO:0042060	wound healing	BP	5	2.52525	0.0103333	5.86313	0.58363	DCN, EPB41L4B, LOX, TGFBR2, WNT5A			X
HBE	GO:0007623	circadian rhythm	BP	5	2.52525	0.00827056	6.254	0.599924	KLF9, NPAS2, PER1, PER2, SERPINE1	X	X	X
HBE	GO:0046854	phosphatidylinositol phosphorylation	BP	5	2.52525	0.0177882	4.9899	0.689603	CD86, IP6K2, IRS2, KITLG, PIK3R1		X	X
HBE	GO:0048015	phosphatidylinositol-mediated signaling	BP	5	2.52525	0.0263059	4.425	0.783271	CD86, IRS2, KITLG, NPR3, PIK3R1			X
HBE	GO:0045766	positive regulation of angiogenesis	BP	5	2.52525	0.0340574	4.0787	0.852086	HIPK2, RHOB, SERPINE1, TGFBR2, WNT5A	X		X
HBE	GO:0007417	central nervous system development	BP	5	2.52525	0.03888	3.90875	0.86879	B3GNT5, CITED2, DNER, NPAS2, ZBTB16			X
HBE	GO:0019221	cytokine-mediated signaling pathway	BP	5	2.52525	0.0507957	3.58054	0.903299	DCN, FLRT3, GHR, IRAK3, TNFSF11	X		X
HBE	GO:0051092	positive regulation of NF-kappaB transcription factor activity	BP	5	2.52525	0.0531546	3.52669	0.906843	IRAK3, NFKBIA, TLR2, TNFSF11, WNT5A			X
HBE	GO:0001501	skeletal system development	BP	5	2.52525	0.0580487	3.42372	0.91372	CDKN1C, FRZB, NPR3, POSTN, ZBTB16			X
HBE	GO:0090090	negative regulation of canonical Wnt signaling pathway	BP	5	2.52525	0.0949911	2.87761	0.981235	DKK1, FOXO3, FRZB, WNT4, WNT5A		X	X
